# Supplementary material for: Undiagnosed Cancer Cases in the US During the First 10 Months of the COVID-19 Pandemic
Source: PubMed Central journal article supplement (PMC10884945; doi:10.1001/jamaoncol.2023.6969), 2024-02-22
Supplement: jamaoncol-e236969-s001.pdf [file jamaoncol-e236969-s001.pdf]

## Supplementary Online Content

Burus T, Lei F, Huang B, et al. Undiagnosed Cancer Cases in the US During the First 10 Months of the COVID-19 Pandemic. *JAMA Oncol*. Published online February 22, 2024. doi:10.1001/jamaoncol.2023.6969

### **eMethods.** Supplemental Description of Methods

**eTable 1.** Study Population, Screenable Cancers and Female Breast Cancer Cases, January 2018-December 2020, USCS Public Use Database, 2001-2020

**eTable 2.** Study Population, Lung and Bronchus Cancer and Colon and Rectum Cancer Cases, January 2018-December 2020, USCS Public Use Database, 2001-2020

**eTable 3.** Study Population, Cervical Cancer and Prostate Cancer Cases, January 2018-December 2020, USCS Public Use Database, 2001-2020

**eTable 4.** Study Population, Corpus and Uterus, NOS Cancer and Melanoma Cases, January 2018-December 2020, USCS Public Use Database, 2001-2020

**eTable 5.** Study Population, Urinary Bladder Cancer and Non-Hodgkin Lymphoma Cases, January 2018-December 2020, USCS Public Use Database, 2001-2020

**eTable 6.** Study Population, Kidney and Renal Pelvis Cancer and Pancreas Cancer Cases, January 2018-December 2020, USCS Public Use Database, 2001-2020

**eTable 7.** Potentially Missed Cancer Cases, by Site and Period, March-December 2020, USCS Public Use Database, 2001-2020

**eFigure 1.** Study Population Sample Flow Diagram for All Sites Cancer Cases

**eFigure 2.** Percentage Difference in Observed from Expected Incidence Rates for Non-Screenable Cancers, by Stage and Period, March-December 2020

**eFigure 3.** Percentage Difference in Observed from Expected All Sites Cancer Incidence Rates, by Population Subgroup and Period, March-December 2020

**eFigure 4.** Percentage Difference in Observed from Expected Incidence Rates, by COVID Response, Site, and Period, March-December 2020.

**eFigure 5.** Percentage Difference in Observed from Expected Incidence Rates, by Urbanicity, Site, and Period, March-December 2020

**eFigure 6.** Percentage Difference in Observed from Expected Incidence Rates, by Age, Site, and Period, March-December 2020

**eFigure 7.** Percentage Difference in Observed from Expected Incidence Rates, by Race, Site, and Period, March-December 2020

**eFigure 8.** Percentage Difference in Observed from Expected Incidence Rates, by Sex, Site, and Period, March-December 2020

This supplementary material has been provided by the authors to give readers additional information about their work

## **eMethods. Supplemental Description of Methods**

### **A. Seasonal ARIMA models, exogenous regressors, model fitting and forecasting.**

In this study we forecasted cancer rates for March–December 2020 by first fitting (seasonal) autoregressive integrated moving average (ARIMA) models with exogenous regressors to observed monthly cancer rate trends from January 2018–December 2020. Basic ARIMA models are a linear combination of autoregressive models (lagged variables) and moving average models (lagged errors) with possible differencing of adjacent terms to induce stationarity. An ARIMA model is specified by the order of the autoregressive component ( $p$ ), the order of the differencing used ( $d$ ), and the order of the moving average component ( $q$ ). Additional seasonal ARIMA parameters  $P$ ,  $D$ , and  $Q$  can be added to handle seasonal trends for seasons of period length  $m$ . Any exogenous regressors are included in the final model as additive regression terms external to the ARIMA model defined.

For our models we postulated two exogenous regressors based on contextual knowledge of the progression of the COVID-19 pandemic in the United States during the year 2020 and a cursory inspection of collected trends. The first exogenous regressor was a pulse effect (a sudden, short-term change in trends) over the period of March–May 2020. This regressor was intended to capture the average change in rates from previous trends during the period of broad stay-at-home orders and was encoded as a vector taking the value 1 for March, April and May 2020 and 0 elsewhere. With this encoding, the exponential of the coefficient of the pulse effect regressor in the best fit model can be interpreted as the rate ratio between the mean observed incidence rate in March–May 2020 and the mean expected incidence rate in March–May 2020.

The second regressor was a step change effect (a sudden and sustained change in trends) over the period of June–December 2020. This regressor was intended to capture the average change in rates from pre-pandemic trends following the conclusion of the period of broad stay-at-home orders. The step change effect was encoded as a vector taking a value of 1 for every month from June–December 2020 and 0 elsewhere. Similar to the pulse effect regressor, encoding the step change effect regressor in this fashion allows us to interpret the exponential of the coefficient of it as the rate ratio between the mean observed incidence rate in June–December 2020 and the mean expected incidence rate in June–December 2020. It was unclear if this effect would prove significant for all or any of the incidence rate time series considered.

A ramp effect regressor (a linear increase or decrease in trends over time) was initially considered in place of a step change effect for the period of June–December 2020, however a basic visual inspection of trends collected contraindicated this.

The graph below illustrates a theoretical time series in which both a significant pulse effect and step change effect are observed:

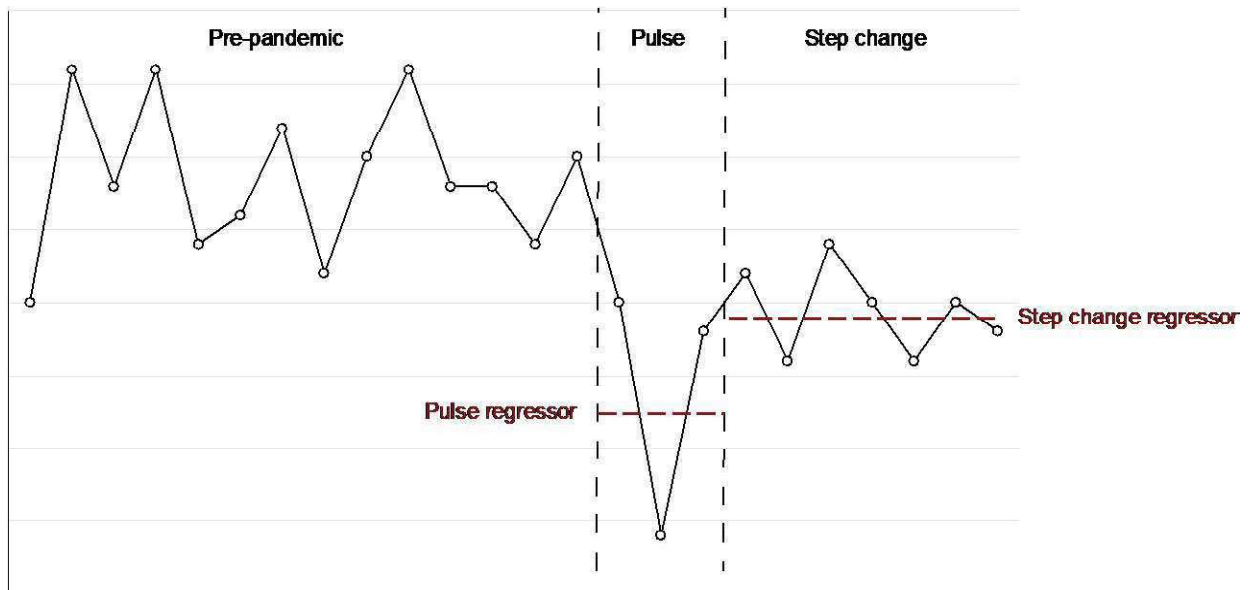

To select the best fit model for a given time series of monthly cancer incidence rates, we first applied a log transformation to rates to stabilize their variance. We then iteratively fit models with both the pulse and step change exogenous regressors using the `auto.arima()` function from the forecast package in R, allowing for maximum  $d$  and  $D$  parameters of 1.<sup>1</sup> The best fit model was selected based on minimum Akaike Information Criteria. A summary for the best fit model was produced and the presence of residual autocorrelation was checked using the Ljung-Box test. If the coefficient for the step change regressors failed to be significant, or if the Ljung-Box test indicated significant residual autocorrelation, then the model was re-fit without the step change regressor. This process was repeated to assess the significance of a pulse impact, which held for all models tested.

To forecast counterfactual rates assuming the COVID-19 pandemic had not occurred, we used the parameters of the best fit model for the full time series and applied them to fit an ARIMA model on the rates from January 2018-February 2020. Expected rates were then calculated for the periods of March-May 2020, June-December 2020, and March-December 2020 using simulations. We performed 10,000 forecasts of monthly rates for June-December 2020, taking the mean of the sum of the simulated rates (or an appropriate subset for the reduced periods) as a point estimate and the 2.5% and 97.5% percentiles of the sum of simulated rates (or an appropriate subset for the reduced periods) as a 95% prediction interval.<sup>2</sup> A random seed was set before running simulations to ensure reproducibility.

## B. Determining severity of COVID response by state stay-at-home orders.

The severity of a state's COVID response was determined by analyzing the dataset 'OxCGRT\_USA\_differentiated\_withnotes\_2020.csv' produced by the Oxford Covid-19 Government Response Tracker (OxCGRT).<sup>3,4</sup> This dataset has been used to track national and sub-national responses to the COVID-19 pandemic since January 2020. In particular, we considered U.S. state level information about statewide stay-at-home requirements (variable 'C6E\_Stay at home requirements', henceforth C6E). Dates for the beginning and end of a state's official statewide stay-at-home orders (if applicable) were determined by looking at dates between March 1, 2020 and May 31, 2020 having C6E value of 2 ("require not leaving house with exceptions for daily exercise, grocery shopping, and 'essential' trips") and a C6E\_Flag value of 1 ("general"). It was found that the median start date of statewide stay-at-home orders across the U.S. was March 27, 2020 and the median end date was May 8, 2020—a period of 42 days. This length of time served as our cutoff for classifying a state's COVID response as being more (stay-at-homes orders for > 42 days) or less (stay-at-home orders ≤ 42 days) restrictive.

Upon constructing the initial dataset, OxCGRT table notes were reviewed (specifically, variable 'C6\_Notes') to determine if adjustments needed to be made to start or end dates for certain states. This process led us to revise the stay-at-home order dates for five states (Massachusetts, Nevada, New Mexico, North Carolina, and Vermont). The final values used for classifying a state's COVID response are listed in the table below:

| State          | Stay-at-home start | Stay-at-home end | Stay-at-home length |
|----------------|--------------------|------------------|---------------------|
| Alabama        | 4/4/2020           | 4/29/2020        | 25                  |
| Alaska         | 3/28/2020          | 4/23/2020        | 26                  |
| Arizona        | 3/31/2020          | 5/15/2020        | 45                  |
| Arkansas       | n/a                | n/a              | 0                   |
| California     | 3/19/2020          | 5/7/2020         | 49                  |
| Colorado       | 3/26/2020          | 4/26/2020        | 31                  |
| Connecticut    | n/a                | n/a              | 0                   |
| Delaware       | 3/24/2020          | 6/1/2020         | 69                  |
| Florida        | 4/3/2020           | 5/3/2020         | 30                  |
| Georgia        | 4/3/2020           | 4/23/2020        | 20                  |
| Hawaii         | 3/25/2020          | 6/1/2020         | 68                  |
| Idaho          | 3/25/2020          | 4/30/2020        | 36                  |
| Illinois       | 3/21/2020          | 6/1/2020         | 72                  |
| Indiana        | 3/25/2020          | 4/11/2020        | 17                  |
| Iowa           | n/a                | n/a              | 0                   |
| Kansas         | 3/30/2020          | 5/3/2020         | 34                  |
| Kentucky       | 3/26/2020          | 5/21/2020        | 56                  |
| Louisiana      | 3/23/2020          | 5/14/2020        | 52                  |
| Maine          | 4/2/2020           | 5/30/2020        | 58                  |
| Maryland       | 3/30/2020          | 5/13/2020        | 44                  |
| Massachusetts  | 3/23/2020          | 5/18/2020        | 56                  |
| Michigan       | 3/24/2020          | 5/17/2020        | 54                  |
| Minnesota      | 3/27/2020          | 5/17/2020        | 51                  |
| Mississippi    | 4/3/2020           | 5/31/2020        | 58                  |
| Missouri       | 4/6/2020           | 5/3/2020         | 27                  |
| Montana        | 3/28/2020          | 4/24/2020        | 27                  |
| Nebraska       | n/a                | n/a              | 0                   |
| Nevada         | 4/1/2020           | 5/15/2020        | 44                  |
| New Hampshire  | 3/27/2020          | 6/1/2020         | 66                  |
| New Jersey     | 3/21/2020          | 6/1/2020         | 72                  |
| New Mexico     | 3/23/2020          | 5/15/2020        | 53                  |
| New York       | 3/22/2020          | 5/14/2020        | 53                  |
| North Carolina | 3/30/2020          | 5/22/2020        | 53                  |
| North Dakota   | n/a                | n/a              | 0                   |
| Ohio           | 3/23/2020          | 5/19/2020        | 57                  |
| Oklahoma       | 3/24/2020          | 4/23/2020        | 30                  |

|                |           |           |    |
|----------------|-----------|-----------|----|
| Oregon         | 3/27/2020 | 5/14/2020 | 48 |
| Pennsylvania   | 4/1/2020  | 5/8/2020  | 36 |
| Rhode Island   | 3/28/2020 | 5/7/2020  | 40 |
| South Carolina | 4/7/2020  | 5/2/2020  | 25 |
| South Dakota   | n/a       | n/a       | 0  |
| Tennessee      | 3/30/2020 | 4/27/2020 | 28 |
| Texas          | 4/2/2020  | 4/30/2020 | 28 |
| Utah           | n/a       | n/a       | 0  |
| Vermont        | 3/24/2020 | 5/15/2020 | 52 |
| Virginia       | 3/30/2020 | 5/14/2020 | 45 |
| Washington     | 3/23/2020 | 5/31/2020 | 69 |
| Washington DC  | 4/1/2020  | 5/28/2020 | 57 |
| West Virginia  | 3/23/2020 | 5/3/2020  | 41 |
| Wisconsin      | 3/25/2020 | 5/12/2020 | 48 |
| Wyoming        | n/a       | n/a       | 0  |

**eTable 1. Study Population, Screenable Cancers and Female Breast Cancer Cases, January 2018-December 2020, USCS Public Use Database, 2001-2020**

|                            | Screenable Cancers |               | Female Breast |               |
|----------------------------|--------------------|---------------|---------------|---------------|
|                            | Pre, N (%)         | Pan, N (%)    | Pre, N (%)    | Pan, N (%)    |
| <b>Total</b>               | 1376281            | 466080        | 562861        | 194092        |
| Included <sup>b</sup>      | 1373124 (99.8)     | 465002 (99.8) | 561754 (99.8) | 193673 (99.8) |
| Missing month <sup>c</sup> | 3157 (0.2)         | 1078 (0.2)    | 1107 (0.2)    | 419 (0.2)     |
| Sex                        |                    |               |               |               |
| Male                       | 404683 (29.5)      | 135471 (29.1) | -             | -             |
| Female                     | 968441 (70.5)      | 329531 (70.9) | 561754 (100)  | 193673 (100)  |
| Age                        |                    |               |               |               |
| Under 65                   | 585100 (42.6)      | 198721 (42.7) | 291389 (51.9) | 100534 (51.9) |
| 65 or older                | 788024 (57.4)      | 266281 (57.3) | 270365 (48.1) | 93139 (48.1)  |
| Race                       |                    |               |               |               |
| Black                      | 161499 (11.8)      | 54711 (11.8)  | 67041 (11.9)  | 23594 (12.2)  |
| White                      | 1130832 (82.4)     | 380879 (81.9) | 457482 (81.4) | 156246 (80.7) |
| Other race <sup>d</sup>    | 80793 (5.9)        | 29412 (6.3)   | 37231 (6.6)   | 13833 (7.1)   |
| Urbanicity                 |                    |               |               |               |
| Metropolitan               | 1112427 (81)       | 376426 (81)   | 468612 (83.4) | 161455 (83.4) |
| Non-metropolitan           | 225201 (16.4)      | 76122 (16.4)  | 77970 (13.9)  | 26816 (13.8)  |
| Unknown                    | 35496 (2.6)        | 12454 (2.7)   | 15172 (2.7)   | 5402 (2.8)    |
| Stage                      |                    |               |               |               |
| Early                      | 615804 (44.8)      | 203667 (43.8) | 372505 (66.3) | 126920 (65.5) |
| Late                       | 675287 (49.2)      | 234723 (50.5) | 172055 (30.6) | 60887 (31.4)  |
| Unknown                    | 82033 (6)          | 26612 (5.7)   | 17194 (3.1)   | 5866 (3)      |
| COVID Response             |                    |               |               |               |
| More restrictive           | 796556 (58)        | 267849 (57.6) | 332906 (59.3) | 113622 (58.7) |
| Less restrictive           | 576568 (42)        | 197153 (42.4) | 228848 (40.7) | 80051 (41.3)  |

<sup>a</sup> Pre-pandemic study period features cases used to build ARIMA models

<sup>b</sup> Denominator used for calculating subgroup percentages

<sup>c</sup> Cases missing month of diagnosis in 2020 were assigned to the pandemic study period

<sup>d</sup> Other race includes American Indian/Alaska Native, Asian or Pacific Islander, and Unknown

Abbreviations: Pre = Pre-pandemic study period (January 2018 – February 2020);

Pan = Pandemic study period (March – December 2020)

**eTable 2. Study Population, Lung and Bronchus Cancer and Colon and Rectum Cancer Cases, January 2018-December 2020, USCS Public Use Database, 2001-2020**

|                            | Lung and Bronchus |               | Colon and Rectum |               |
|----------------------------|-------------------|---------------|------------------|---------------|
|                            | Pre, N (%)        | Pan, N (%)    | Pre, N (%)       | Pan, N (%)    |
| <b>Total</b>               | 478698            | 160097        | 306894           | 102605        |
| Included <sup>b</sup>      | 477496 (99.7)     | 159706 (99.8) | 306176 (99.8)    | 102374 (99.8) |
| Missing month <sup>c</sup> | 1202 (0.3)        | 391 (0.2)     | 718 (0.2)        | 231 (0.2)     |
| Sex                        |                   |               |                  |               |
| Male                       | 242227 (50.7)     | 81413 (51)    | 162456 (53.1)    | 54058 (52.8)  |
| Female                     | 235269 (49.3)     | 78293 (49)    | 143720 (46.9)    | 48316 (47.2)  |
| Age                        |                   |               |                  |               |
| Under 65                   | 138329 (29)       | 45671 (28.6)  | 133490 (43.6)    | 45306 (44.3)  |
| 65 or older                | 339167 (71)       | 114035 (71.4) | 172686 (56.4)    | 57068 (55.7)  |
| Race                       |                   |               |                  |               |
| Black                      | 51844 (10.9)      | 16997 (10.6)  | 38310 (12.5)     | 12750 (12.5)  |
| White                      | 404775 (84.8)     | 135293 (84.7) | 247666 (80.9)    | 82403 (80.5)  |
| Other race <sup>d</sup>    | 20877 (4.4)       | 7416 (4.6)    | 20200 (6.6)      | 7221 (7.1)    |
| Urbanicity                 |                   |               |                  |               |
| Metropolitan               | 375483 (78.6)     | 125224 (78.4) | 245502 (80.2)    | 82136 (80.2)  |
| Non-metropolitan           | 89931 (18.8)      | 30239 (18.9)  | 53094 (17.3)     | 17637 (17.2)  |
| Unknown                    | 12082 (2.5)       | 4243 (2.7)    | 7580 (2.5)       | 2601 (2.5)    |
| Stage                      |                   |               |                  |               |
| Early                      | 131091 (27.5)     | 42617 (26.7)  | 100209 (32.7)    | 30494 (29.8)  |
| Late                       | 307891 (64.5)     | 105067 (65.8) | 181648 (59.3)    | 63821 (62.3)  |
| Unknown                    | 38514 (8.1)       | 12022 (7.5)   | 24319 (7.9)      | 8059 (7.9)    |
| COVID Response             |                   |               |                  |               |
| More restrictive           | 272803 (57.1)     | 90964 (57)    | 175674 (57.4)    | 58295 (56.9)  |
| Less restrictive           | 204693 (42.9)     | 68742 (43)    | 130502 (42.6)    | 44079 (43.1)  |

<sup>a</sup> Pre-pandemic study period features cases used to build ARIMA models

<sup>b</sup> Denominator used for calculating subgroup percentages

<sup>c</sup> Cases missing month of diagnosis in 2020 were assigned to the pandemic study period

<sup>d</sup> Other race includes American Indian/Alaska Native, Asian or Pacific Islander, and Unknown  
Abbreviations: Pre = Pre-pandemic study period (January 2018 – February 2020);  
Pan = Pandemic study period (March – December 2020)

**eTable 3. Study Population, Cervical Cancer and Prostate Cancer Cases, January 2018-December 2020, USCS Public Use Database, 2001-2020**

|                            | Cervix Uteri |             | Prostate      |               |
|----------------------------|--------------|-------------|---------------|---------------|
|                            | Pre, N (%)   | Pan, N (%)  | Pre, N (%)    | Pan, N (%)    |
| <b>Total</b>               | 27828        | 9286        | 491660        | 160521        |
| Included <sup>b</sup>      | 27698 (99.5) | 9249 (99.6) | 489165 (99.5) | 159612 (99.4) |
| Missing month <sup>c</sup> | 130 (0.5)    | 37 (0.4)    | 2495 (0.5)    | 909 (0.6)     |
| Sex                        |              |             |               |               |
| Male                       | -            | -           | 489165 (100)  | 159612 (100)  |
| Female                     | 27698 (100)  | 9249 (100)  | -             | -             |
| Age                        |              |             |               |               |
| Under 65                   | 21892 (79)   | 7210 (78)   | 181811 (37.2) | 56345 (35.3)  |
| 65 or older                | 5806 (21)    | 2039 (22)   | 307354 (62.8) | 103267 (64.7) |
| Race                       |              |             |               |               |
| Black                      | 4304 (15.5)  | 1370 (14.8) | 78666 (16.1)  | 25313 (15.9)  |
| White                      | 20909 (75.5) | 6937 (75)   | 379172 (77.5) | 122258 (76.6) |
| Other race <sup>d</sup>    | 2485 (9)     | 942 (10.2)  | 31327 (6.4)   | 12041 (7.5)   |
| Urbanicity                 |              |             |               |               |
| Metropolitan               | 22830 (82.4) | 7611 (82.3) | 400498 (81.9) | 130994 (82.1) |
| Non-metropolitan           | 4206 (15.2)  | 1430 (15.5) | 76546 (15.6)  | 24471 (15.3)  |
| Unknown                    | 662 (2.4)    | 208 (2.2)   | 12121 (2.5)   | 4147 (2.6)    |
| Stage                      |              |             |               |               |
| Early                      | 11999 (43.3) | 3636 (39.3) | 342480 (70)   | 107084 (67.1) |
| Late                       | 13693 (49.4) | 4948 (53.5) | 102976 (21.1) | 35988 (22.5)  |
| Unknown                    | 2006 (7.2)   | 665 (7.2)   | 43709 (8.9)   | 16540 (10.4)  |
| COVID Response             |              |             |               |               |
| More restrictive           | 15173 (54.8) | 4968 (53.7) | 289165 (59.1) | 94763 (59.4)  |
| Less restrictive           | 12525 (45.2) | 4281 (46.3) | 200000 (40.9) | 64849 (40.6)  |

<sup>a</sup> Pre-pandemic study period features cases used to build ARIMA models

<sup>b</sup> Denominator used for calculating subgroup percentages

<sup>c</sup> Cases missing month of diagnosis in 2020 were assigned to the pandemic study period

<sup>d</sup> Other race includes American Indian/Alaska Native, Asian or Pacific Islander, and Unknown  
Abbreviations: Pre = Pre-pandemic study period (January 2018 – February 2020);  
Pan = Pandemic study period (March – December 2020)



**eTable 4. Study Population, Corpus and Uterus, NOS Cancer and Melanoma Cases, January 2018-December 2020, USCS Public Use Database, 2001-2020**

|                            | Corpus and Uterus, NOS |              | Melanoma      |              |
|----------------------------|------------------------|--------------|---------------|--------------|
|                            | Pre, N (%)             | Pan, N (%)   | Pre, N (%)    | Pan, N (%)   |
| <b>Total</b>               | 126875                 | 44717        | 188718        | 62410        |
| Included <sup>b</sup>      | 126625 (99.8)          | 44632 (99.8) | 188150 (99.7) | 62200 (99.7) |
| Missing month <sup>c</sup> | 250 (0.2)              | 85 (0.2)     | 568 (0.3)     | 210 (0.3)    |
| Sex                        |                        |              |               |              |
| Male                       | -                      | -            | 111393 (59.2) | 36317 (58.4) |
| Female                     | 126625 (100)           | 44632 (100)  | 76757 (40.8)  | 25883 (41.6) |
| Age                        |                        |              |               |              |
| Under 65                   | 65966 (52.1)           | 22744 (51)   | 85143 (45.3)  | 27694 (44.5) |
| 65 or older                | 60659 (47.9)           | 21888 (49)   | 103007 (54.7) | 34506 (55.5) |
| Race                       |                        |              |               |              |
| Black                      | 16152 (12.8)           | 5915 (13.3)  | 826 (0.4)     | 286 (0.5)    |
| White                      | 101939 (80.5)          | 35452 (79.4) | 176764 (93.9) | 57379 (92.2) |
| Other race <sup>d</sup>    | 8534 (6.7)             | 3265 (7.3)   | 10560 (5.6)   | 4535 (7.3)   |
| Urbanicity                 |                        |              |               |              |
| Metropolitan               | 104941 (82.9)          | 36924 (82.7) | 154711 (82.2) | 50745 (81.6) |
| Non-metropolitan           | 18391 (14.5)           | 6470 (14.5)  | 28489 (15.1)  | 9793 (15.7)  |
| Unknown                    | 3293 (2.6)             | 1238 (2.8)   | 4950 (2.6)    | 1662 (2.7)   |
| Stage                      |                        |              |               |              |
| Early                      | 87327 (69)             | 30182 (67.6) | 144650 (76.9) | 46610 (74.9) |
| Late                       | 32869 (26)             | 12350 (27.7) | 25858 (13.7)  | 9565 (15.4)  |
| Unknown                    | 6429 (5.1)             | 2100 (4.7)   | 17642 (9.4)   | 6025 (9.7)   |
| COVID Response             |                        |              |               |              |
| More restrictive           | 76389 (60.3)           | 26946 (60.4) | 112053 (59.6) | 36949 (59.4) |
| Less restrictive           | 50236 (39.7)           | 17686 (39.6) | 76097 (40.4)  | 25251 (40.6) |

<sup>a</sup> Pre-pandemic study period features cases used to build ARIMA models

<sup>b</sup> Denominator used for calculating subgroup percentages

<sup>c</sup> Cases missing month of diagnosis in 2020 were assigned to the pandemic study period

<sup>d</sup> Other race includes American Indian/Alaska Native, Asian or Pacific Islander, and Unknown

Abbreviations: Pre = Pre-pandemic study period (January 2018 – February 2020);

Pan = Pandemic study period (March – December 2020); NOS = Not otherwise specified

**eTable 5. Study Population, Urinary Bladder Cancer and Non-Hodgkin Lymphoma Cases, January 2018-December 2020, USCS Public Use Database, 2001-2020**

|                            | Urinary Bladder |              | Non-Hodgkin Lymphoma |              |
|----------------------------|-----------------|--------------|----------------------|--------------|
|                            | Pre, N (%)      | Pan, N (%)   | Pre, N (%)           | Pan, N (%)   |
| <b>Total</b>               | 162732          | 57484        | 156180               | 54576        |
| Included <sup>b</sup>      | 162299 (99.7)   | 57354 (99.8) | 155734 (99.7)        | 54425 (99.7) |
| Missing month <sup>c</sup> | 433 (0.3)       | 130 (0.2)    | 446 (0.3)            | 151 (0.3)    |
| Sex                        |                 |              |                      |              |
| Male                       | 123666 (76.2)   | 43932 (76.6) | 86117 (55.3)         | 30188 (55.5) |
| Female                     | 38633 (23.8)    | 13422 (23.4) | 69617 (44.7)         | 24237 (44.5) |
| Age                        |                 |              |                      |              |
| Under 65                   | 38342 (23.6)    | 13219 (23)   | 61342 (39.4)         | 20791 (38.2) |
| 65 or older                | 123957 (76.4)   | 44135 (77)   | 94392 (60.6)         | 33634 (61.8) |
| Race                       |                 |              |                      |              |
| Black                      | 9927 (6.1)      | 3509 (6.1)   | 12882 (8.3)          | 4349 (8)     |
| White                      | 145826 (89.9)   | 51173 (89.2) | 133231 (85.6)        | 46338 (85.1) |
| Other race <sup>d</sup>    | 6546 (4)        | 2672 (4.7)   | 9621 (6.2)           | 3738 (6.9)   |
| Urbanicity                 |                 |              |                      |              |
| Metropolitan               | 130936 (80.7)   | 46139 (80.4) | 128839 (82.7)        | 44904 (82.5) |
| Non-metropolitan           | 27473 (16.9)    | 9770 (17)    | 23221 (14.9)         | 8143 (15)    |
| Unknown                    | 3890 (2.4)      | 1445 (2.5)   | 3674 (2.4)           | 1378 (2.5)   |
| Stage                      |                 |              |                      |              |
| Early                      | 57096 (35.2)    | 20668 (36)   | 37810 (24.3)         | 12917 (23.7) |
| Late                       | 20045 (12.4)    | 7668 (13.4)  | 99338 (63.8)         | 35754 (65.7) |
| Unknown                    | 85158 (52.5)    | 29018 (50.6) | 18586 (11.9)         | 5754 (10.6)  |
| COVID Response             |                 |              |                      |              |
| More restrictive           | 95702 (59)      | 33773 (58.9) | 91145 (58.5)         | 31737 (58.3) |
| Less restrictive           | 66597 (41)      | 23581 (41.1) | 64589 (41.5)         | 22688 (41.7) |

<sup>a</sup> Pre-pandemic study period features cases used to build ARIMA models

<sup>b</sup> Denominator used for calculating subgroup percentages

<sup>c</sup> Cases missing month of diagnosis in 2020 were assigned to the pandemic study period

<sup>d</sup> Other race includes American Indian/Alaska Native, Asian or Pacific Islander, and Unknown

Abbreviations: Pre = Pre-pandemic study period (January 2018 – February 2020);

Pan = Pandemic study period (March – December 2020)

**eTable 6. Study Population, Kidney and Renal Pelvis Cancer and Pancreas Cancer Cases, January 2018-December 2020, USCS Public Use Database, 2001-2020**

|                            | Kidney and Renal Pelvis |              | Pancreas      |              |
|----------------------------|-------------------------|--------------|---------------|--------------|
|                            | Pre, N (%)              | Pan, N (%)   | Pre, N (%)    | Pan, N (%)   |
| <b>Total</b>               | 147030                  | 50796        | 116525        | 43442        |
| Included <sup>b</sup>      | 146690 (99.8)           | 50679 (99.8) | 116141 (99.7) | 43328 (99.7) |
| Missing month <sup>c</sup> | 340 (0.2)               | 117 (0.2)    | 384 (0.3)     | 114 (0.3)    |
| Sex                        |                         |              |               |              |
| Male                       | 93433 (63.7)            | 32792 (64.7) | 60211 (51.8)  | 22639 (52.3) |
| Female                     | 53257 (36.3)            | 17887 (35.3) | 55930 (48.2)  | 20689 (47.7) |
| Age                        |                         |              |               |              |
| Under 65                   | 70548 (48.1)            | 24082 (47.5) | 36032 (31)    | 13117 (30.3) |
| 65 or older                | 76142 (51.9)            | 26597 (52.5) | 80109 (69)    | 30211 (69.7) |
| Race                       |                         |              |               |              |
| Black                      | 18073 (12.3)            | 6108 (12.1)  | 14995 (12.9)  | 5497 (12.7)  |
| White                      | 121155 (82.6)           | 41746 (82.4) | 95182 (82)    | 35422 (81.8) |
| Other race <sup>d</sup>    | 7462 (5.1)              | 2825 (5.6)   | 5964 (5.1)    | 2409 (5.6)   |
| Urbanicity                 |                         |              |               |              |
| Metropolitan               | 118346 (80.7)           | 40898 (80.7) | 94882 (81.7)  | 35527 (82)   |
| Non-metropolitan           | 24756 (16.9)            | 8505 (16.8)  | 18267 (15.7)  | 6665 (15.4)  |
| Unknown                    | 3588 (2.4)              | 1276 (2.5)   | 2992 (2.6)    | 1136 (2.6)   |
| Stage                      |                         |              |               |              |
| Early                      | 98480 (67.1)            | 33182 (65.5) | 19332 (16.6)  | 7239 (16.7)  |
| Late                       | 41263 (28.1)            | 15322 (30.2) | 84374 (72.6)  | 31920 (73.7) |
| Unknown                    | 6947 (4.7)              | 2175 (4.3)   | 12435 (10.7)  | 4169 (9.6)   |
| COVID Response             |                         |              |               |              |
| More restrictive           | 83462 (56.9)            | 28371 (56)   | 68738 (59.2)  | 25231 (58.2) |
| Less restrictive           | 63228 (43.1)            | 22308 (44)   | 47403 (40.8)  | 18097 (41.8) |

<sup>a</sup> Pre-pandemic study period features cases used to build ARIMA models

<sup>b</sup> Denominator used for calculating subgroup percentages

<sup>c</sup> Cases missing month of diagnosis in 2020 were assigned to the pandemic study period

<sup>d</sup> Other race includes American Indian/Alaska Native, Asian or Pacific Islander, and Unknown

Abbreviations: Pre = Pre-pandemic study period (January 2018 – February 2020);

Pan = Pandemic study period (March – December 2020)

**eTable 7. Potentially Missed Cancer Cases, by Site and Period, March-December 2020, USCS Public Use Database, 2001-2020<sup>5</sup>**

|                         | Period   | Observed Rate <sup>a</sup> | Expected Rate (95% PI) | Relative Difference (95% PI) | Potential Missed Cases (95% PI) |
|-------------------------|----------|----------------------------|------------------------|------------------------------|---------------------------------|
| Female Breast           | Mar-May  | 21.7                       | 32.5 (31.3, 33.8)      | -33.2% (-35.7%, -30.5%)*     | 14805 (13115, 16591)            |
|                         | June-Dec | 74.7                       | 76.2 (74.5, 77.9)      | -2.0% (-4.1%, 0.2%)          | 2065 (-227, 4432)               |
|                         | Mar-Dec  | 96.4                       | 108.7 (106.9, 110.5)   | -11.3% (-12.8%, -9.8%)*      | 16870 (14438, 19360)            |
| Lung and Bronchus       | Mar-May  | 10.2                       | 13.8 (13.5, 14.1)      | -26.4% (-27.9%, -24.8%)*     | 9986 (9196, 10803)              |
|                         | June-Dec | 28.0                       | 30.3 (29.9, 30.7)      | -7.6% (-8.8%, -6.5%)*        | 6346 (5300, 7423)               |
|                         | Mar-Dec  | 38.1                       | 44.1 (43.7, 44.5)      | -13.5% (-14.3%, -12.7%)*     | 16333 (15203, 17490)            |
| Colon and Rectum        | Mar-May  | 6.2                        | 9.3 (9.0, 9.6)         | -32.7% (-34.9%, -30.4%)*     | 8321 (7485, 9187)               |
|                         | June-Dec | 20.2                       | 21.3 (20.9, 21.8)      | -5.5% (-7.4%, -3.5%)*        | 3200 (2000, 4428)               |
|                         | Mar-Dec  | 26.4                       | 30.6 (30.1, 31.1)      | -13.7% (-15.2%, -12.2%)*     | 11521 (10095, 12968)            |
| Cervix Uteri            | Mar-May  | 1.5                        | 2.0 (1.9, 2.0)         | -23.9% (-26.9%, -20.9%)*     | 643 (539, 752)                  |
|                         | June-Dec | 4.0                        | 4.4 (4.3, 4.5)         | -9.0% (-11.2%, -6.8%)*       | 542 (396, 691)                  |
|                         | Mar-Dec  | 5.5                        | 6.3 (6.2, 6.5)         | -13.6% (-15.3%, -11.9%)*     | 1186 (1014, 1362)               |
| Prostate                | Mar-May  | 18.8                       | 28.9 (27.3, 30.5)      | -34.9% (-38.5%, -31.2%)*     | 13856 (11712, 16138)            |
|                         | June-Dec | 60.7                       | 67.3 (65, 69.6)        | -9.8% (-12.9%, -6.7%)*       | 9094 (5975, 12293)              |
|                         | Mar-Dec  | 79.5                       | 96.2 (93.5, 98.9)      | -17.4% (-19.6%, -15.1%)*     | 22950 (19337, 26646)            |
| Corpus and Uterus, NOS  | Mar-May  | 5.0                        | 7.1 (6.9, 7.4)         | -29.7% (-31.9%, -27.5%)*     | 2916 (2617, 3226)               |
|                         | June-Dec | 15.8                       | 16.3 (16.0, 16.6)      | -2.9% (-4.6%, -1.1%)*        | 643 (248, 1051)                 |
|                         | Mar-Dec  | 20.9                       | 23.5 (23.1, 23.8)      | -11.0% (-12.3%, -9.8%)*      | 3559 (3115, 4013)               |
| Melanoma                | Mar-May  | 3.4                        | 6 (5.6, 6.4)           | -43.4% (-47.1%, -39.4%)*     | 7098 (6016, 8241)               |
|                         | June-Dec | 12.8                       | 13.6 (13.0, 14.2)      | -6.1% (-10.3%, -1.8%)*       | 2292 (626, 4003)                |
|                         | Mar-Dec  | 16.1                       | 19.5 (18.8, 20.3)      | -17.5% (-20.6%, -14.3%)*     | 9390 (7393, 11459)              |
| Urinary Bladder         | Mar-May  | 3.7                        | 4.8 (4.7, 5.0)         | -24.0% (-26.7%, -21.1%)*     | 3185 (2709, 3679)               |
|                         | June-Dec | 10.3                       | 10.8 (10.5, 11.0)      | -4.2% (-6.3%, -2.0%)*        | 1230 (571, 1901)                |
|                         | Mar-Dec  | 14.0                       | 15.6 (15.3, 15.9)      | -10.3% (-12.0%, -8.6%)*      | 4415 (3630, 5214)               |
| Non-Hodgkin Lymphoma    | Mar-May  | 3.6                        | 4.8 (4.7, 5.0)         | -25.5% (-28.0%, -23.0%)*     | 3394 (2953, 3847)               |
|                         | June-Dec | 10.2                       | 10.8 (10.5, 11)        | -4.7% (-6.7%, -2.7%)*        | 1393 (793, 2004)                |
|                         | Mar-Dec  | 13.8                       | 15.6 (15.3, 15.9)      | -11.2% (-12.7%, -9.7%)*      | 4787 (4072, 5516)               |
| Kidney and Renal Pelvis | Mar-May  | 3.3                        | 4.5 (4.4, 4.7)         | -25.8% (-28.3%, -23.3%)*     | 3196 (2781, 3623)               |
|                         | June-Dec | 9.5                        | 10.3 (10.1, 10.6)      | -7.8% (-9.7%, -5.9%)*        | 2213 (1627, 2810)               |
|                         | Mar-Dec  | 12.9                       | 14.8 (14.6, 15.1)      | -13.3% (-14.7%, -11.8%)*     | 5408 (4716, 6115)               |
| Pancreas                | Mar-May  | 2.9                        | 3.4 (3.3, 3.6)         | -14.3% (-18.2%, -10.3%)*     | 1346 (925, 1787)                |
|                         | June-Dec | 7.6                        | 7.8 (7.6, 8.1)         | -2.7% (-5.6%, 0.2%)          | 585 (41, 1232)                  |
|                         | Mar-Dec  | 10.6                       | 11.3 (11.0, 11.5)      | -6.2% (-8.5%, -3.9%)*        | 1931 (1173, 2706)               |

\* Significant disruption in observed versus expected incidence rates, based on 95% prediction interval not including 0

<sup>a</sup> Rates given per 100,000 people in the population and age-adjusted to the 2000 U.S. Standard Population

Abbreviations: PI = Prediction Interval; Mar = March; Dec = December

**eFigure 1. Study population sample flow diagram for All Sites Cancer Cases.**  
 Similar process repeated for 11 site-specific cancers analyzed.

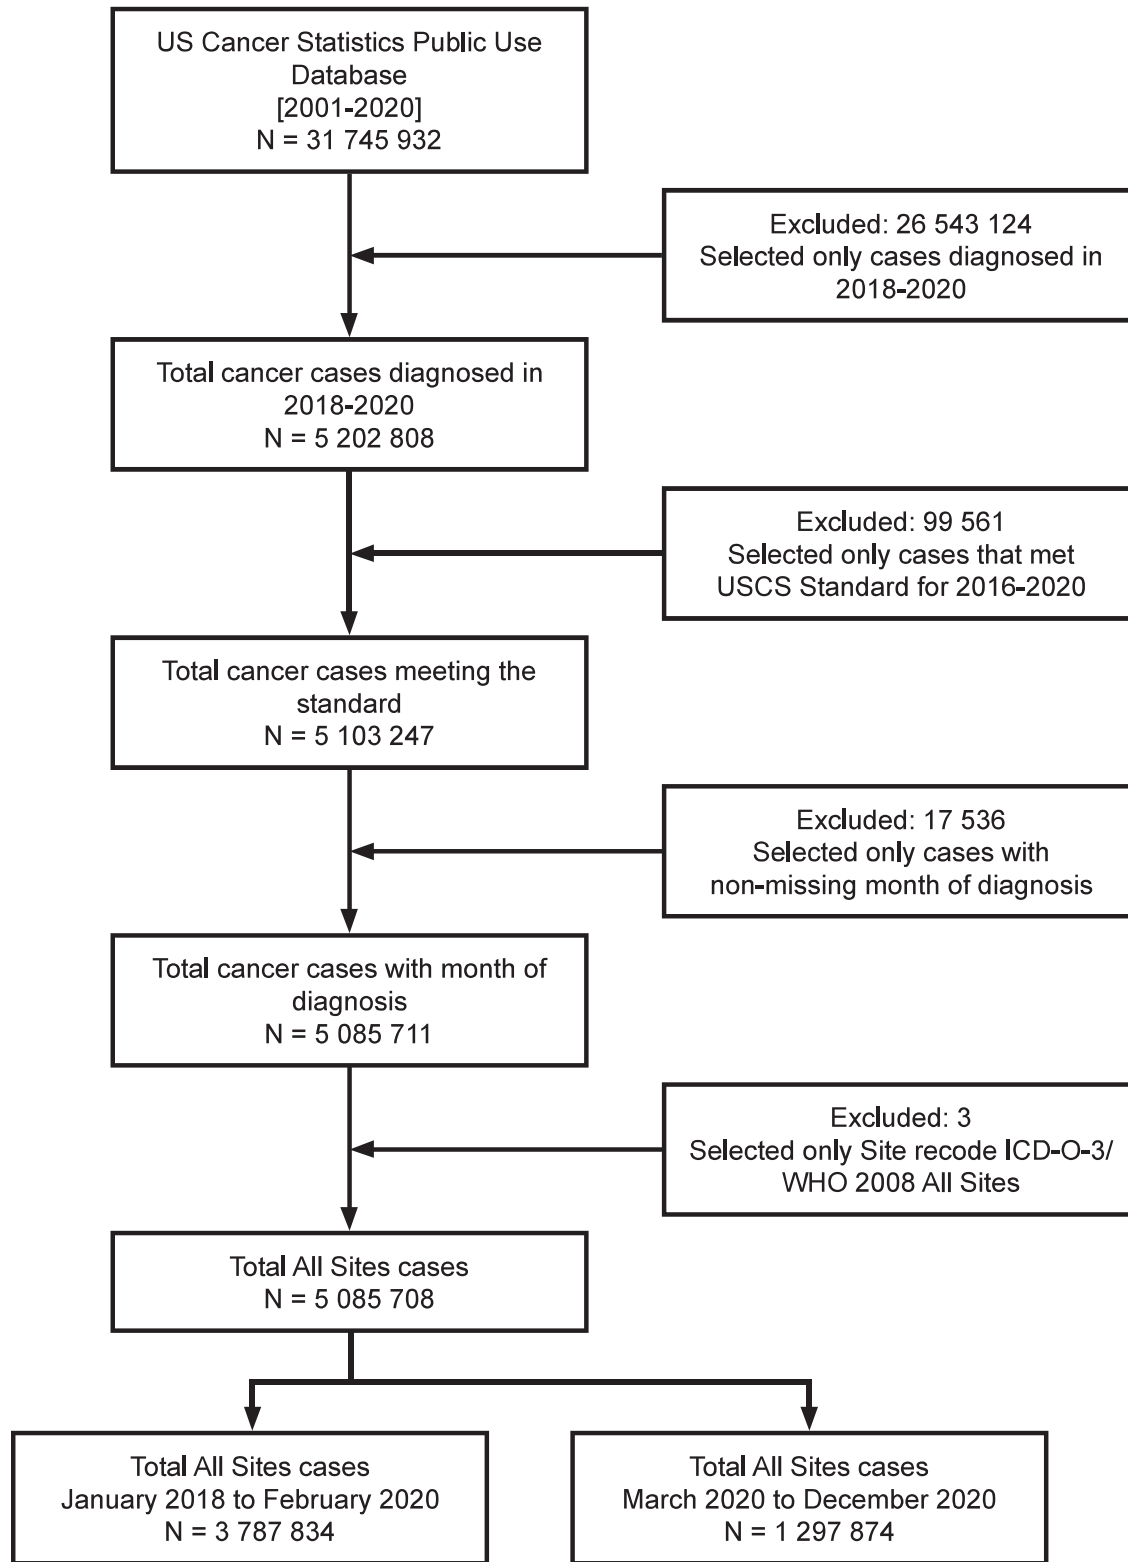

**eFigure 2. Percentage Difference in Observed from Expected Incidence Rates for Non-screenable Cancers, by Site, Stage, and Period, March-December 2020.**  
 Error bars indicate the 95% prediction interval (PI). (\*) indicates significant disruption based on 95% PI not containing 0.

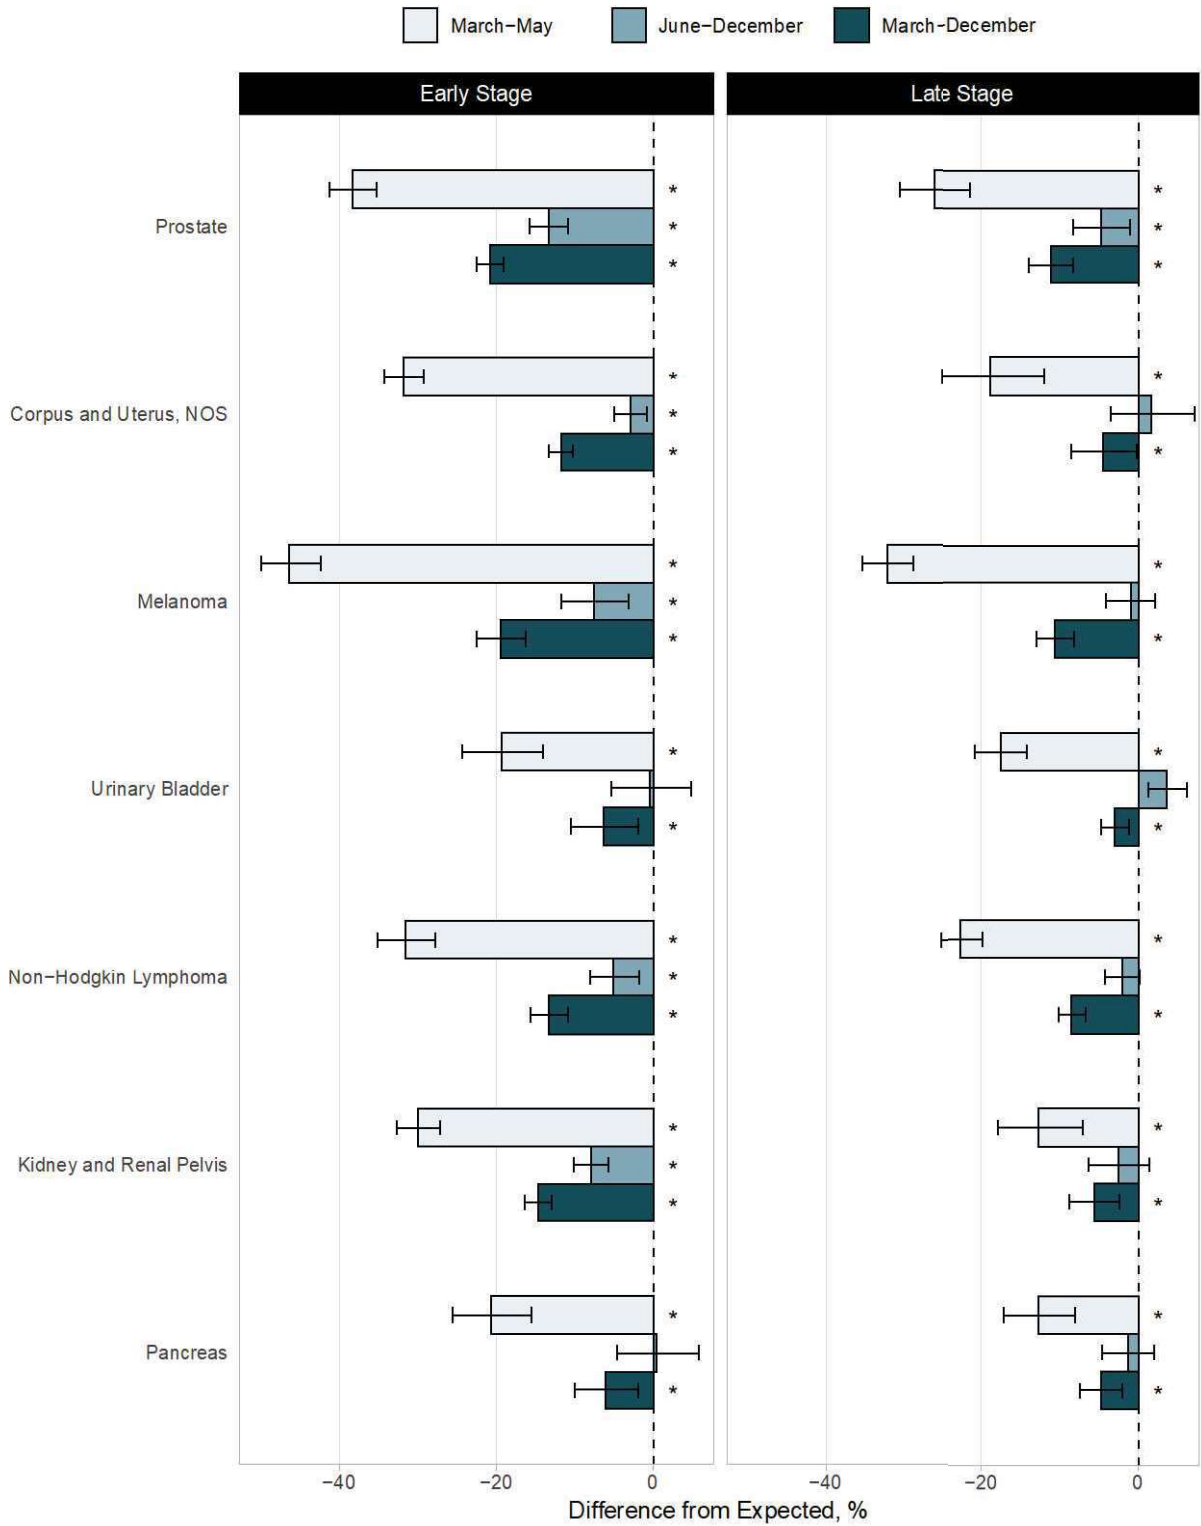

**eFigure 3. Percentage Difference in Observed from Expected All Sites Cancer Incidence Rates, by Population Subgroup and Period, March-December 2020.** Error bars indicate the 95% prediction interval (PI). (\*) indicates significantly worse disruption than comparison group based on non-overlapping 95% PIs.

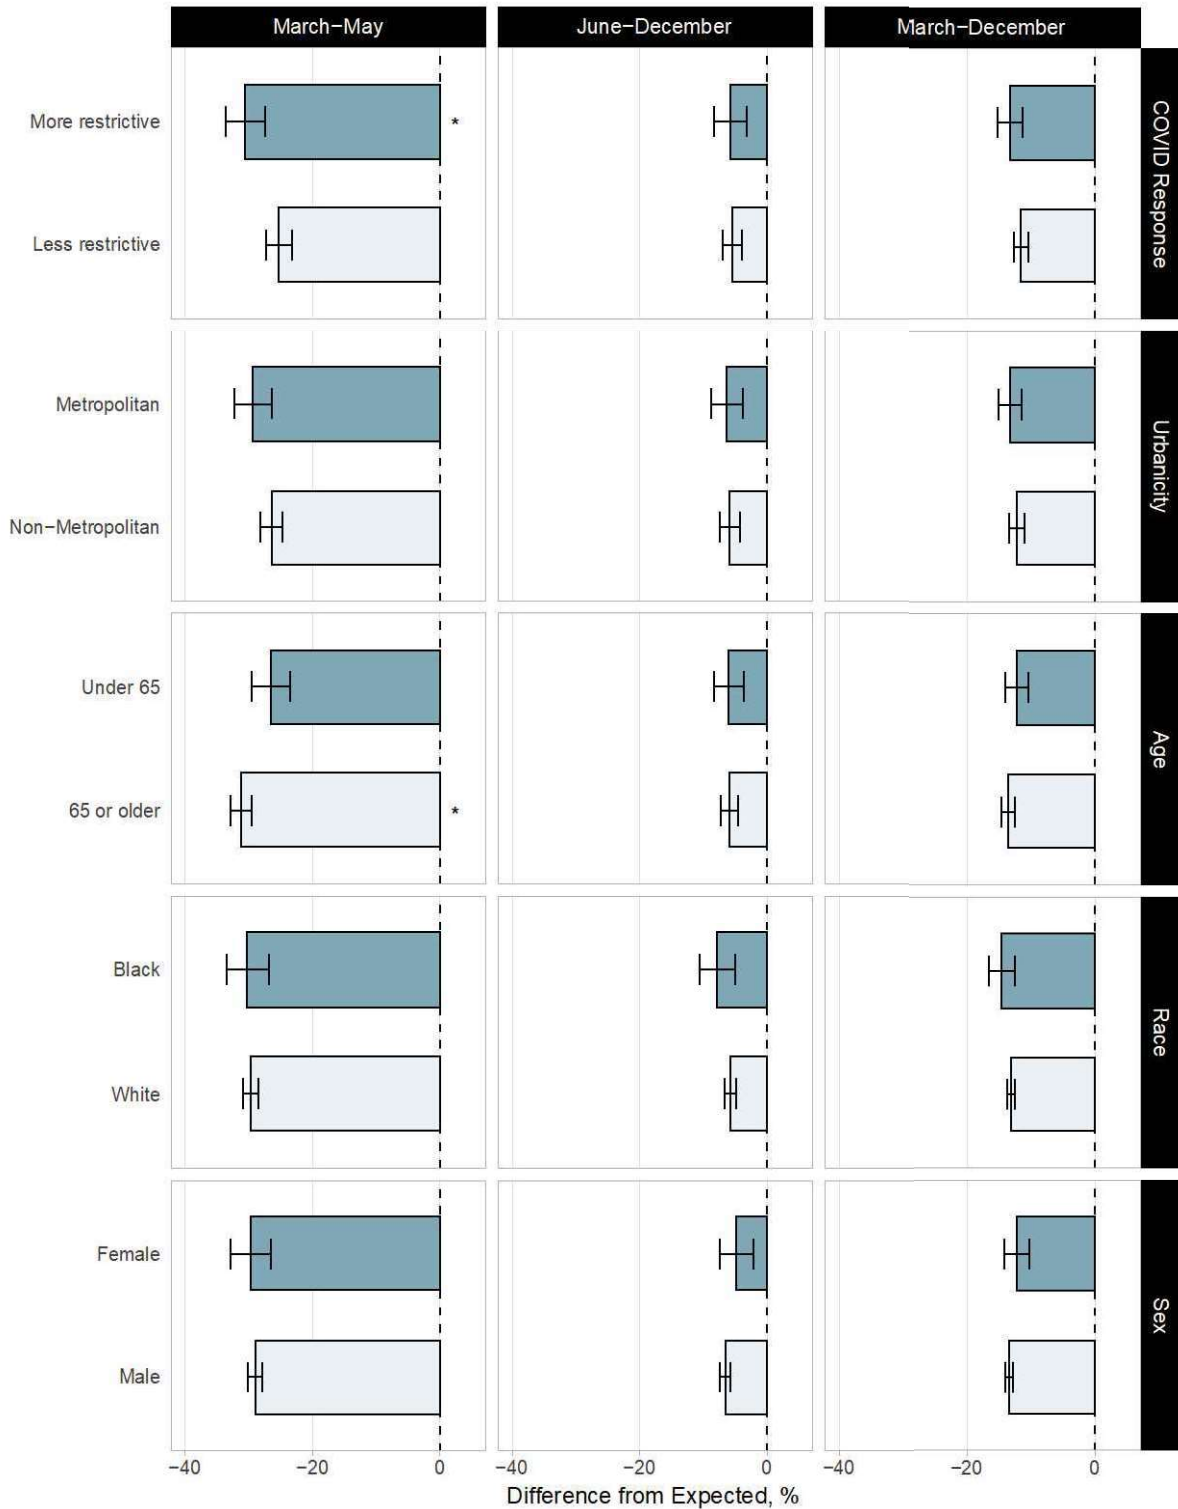

**eFigure 4. Percentage Difference in Observed from Expected Incidence Rates, by COVID Response, Site, and Period, March-December 2020.** Error bars indicate the 95% prediction interval (PI). (\*) indicates significantly worse disruption than comparison group based on non-overlapping 95% PIs.

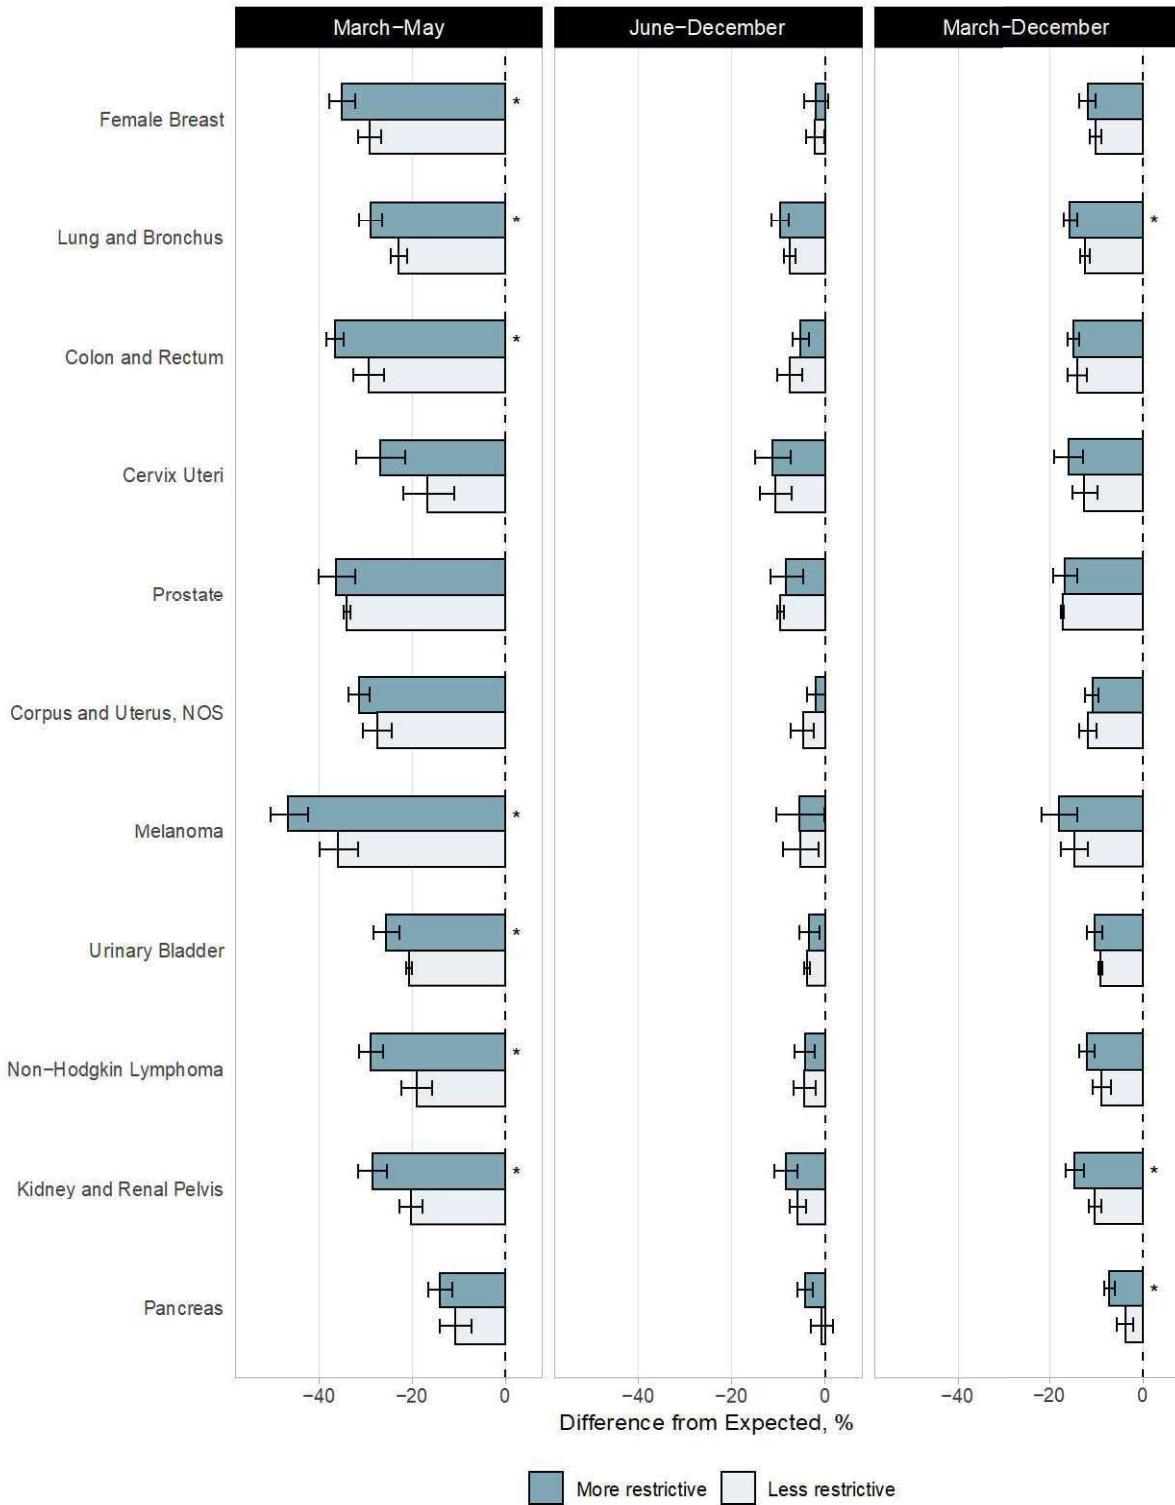



**eFigure 5. Percentage Difference in Observed from Expected Incidence Rates, by Urbanicity, Site, and Period, March-December 2020.** Error bars indicate the 95% prediction interval (PI). (\*) indicates significantly worse disruption than comparison group based on non-overlapping 95% PIs.

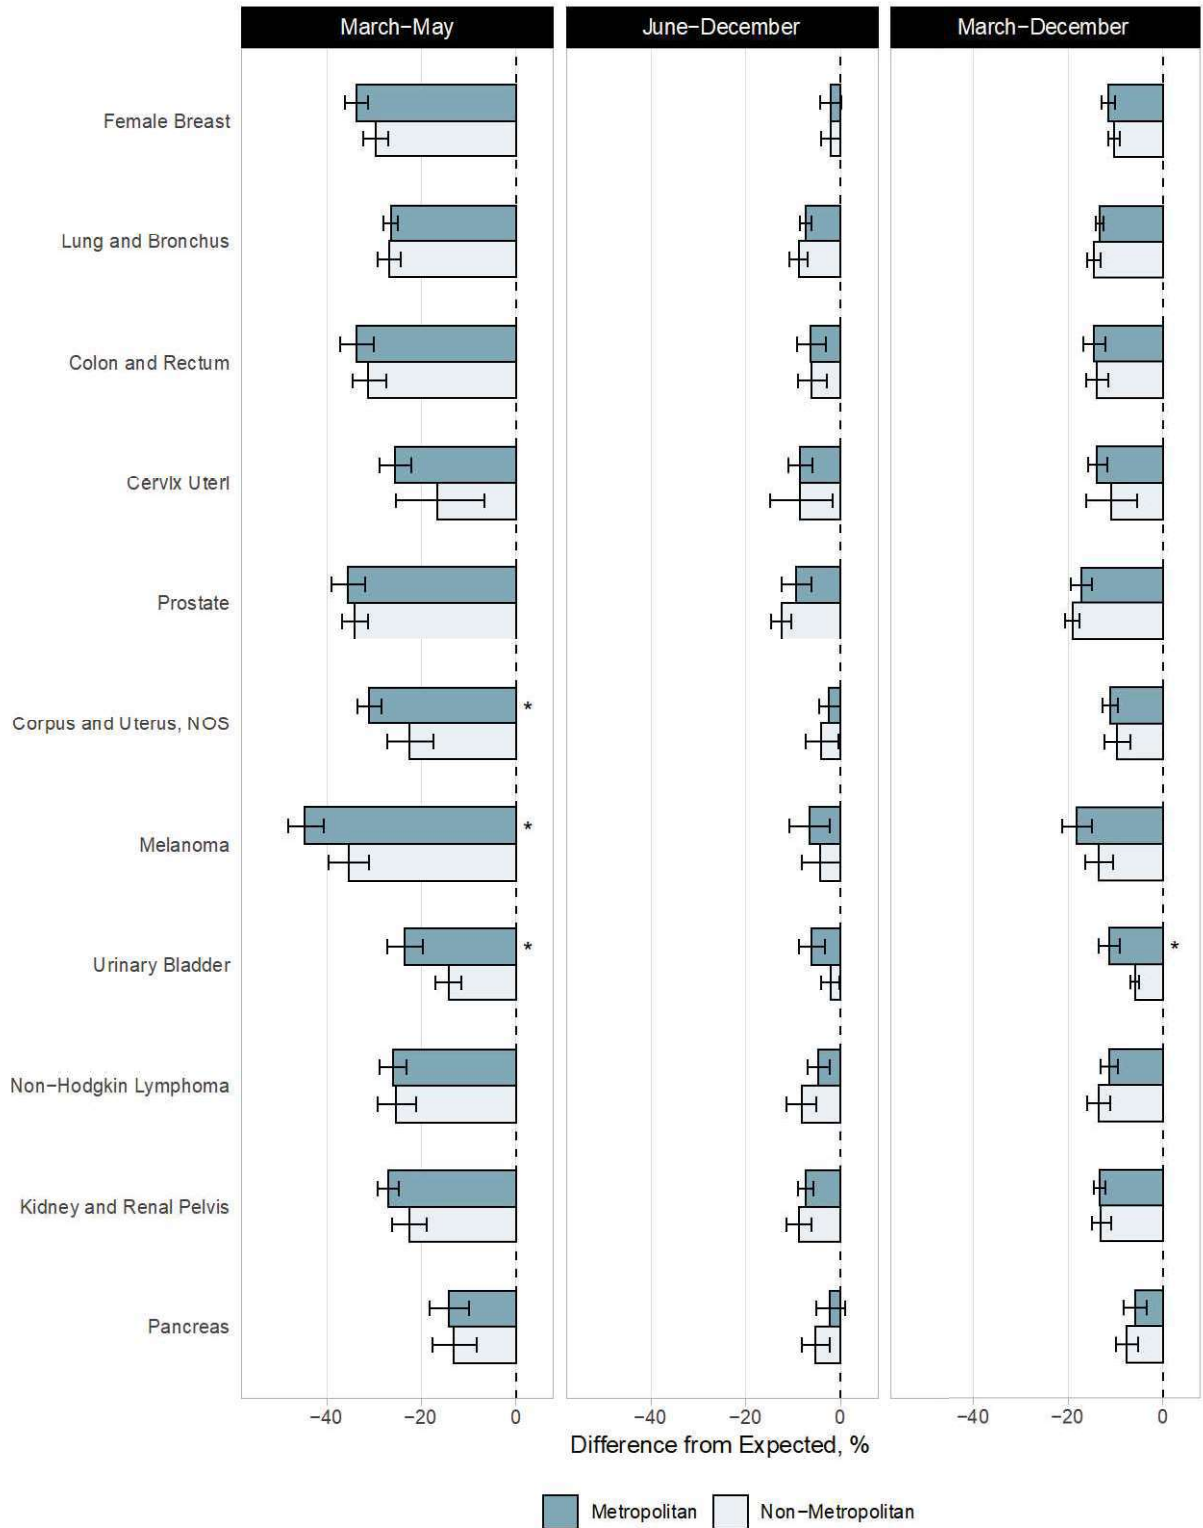

**eFigure 6. Percentage Difference in Observed from Expected Incidence Rates, by Age, Site, and Period, March-December 2020.** Error bars indicate the 95% prediction interval (PI). (\*) indicates significantly worse disruption than comparison group based on non-overlapping 95% PIs.

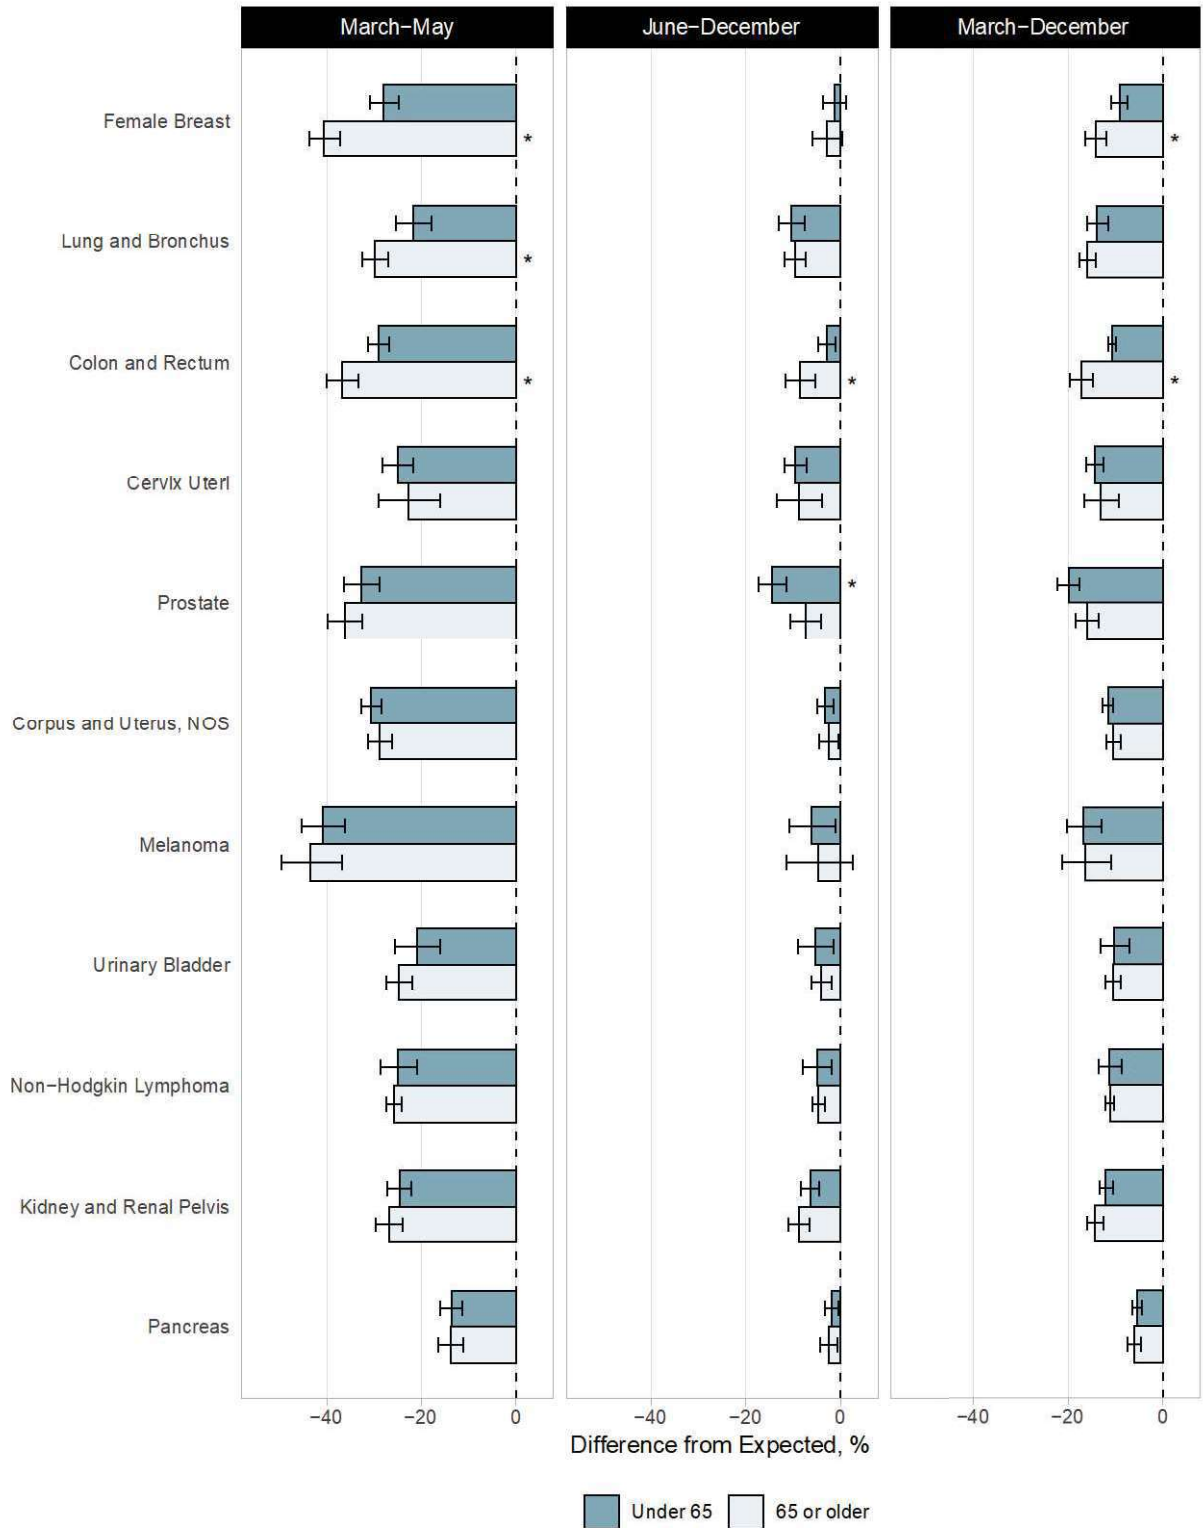

**eFigure 7. Percentage Difference in Observed from Expected Incidence Rates, by Race, Site, and Period, March-December 2020.** Error bars indicate the 95% prediction interval (PI). (\*) indicates significantly worse disruption than comparison group based on non-overlapping 95% PIs.

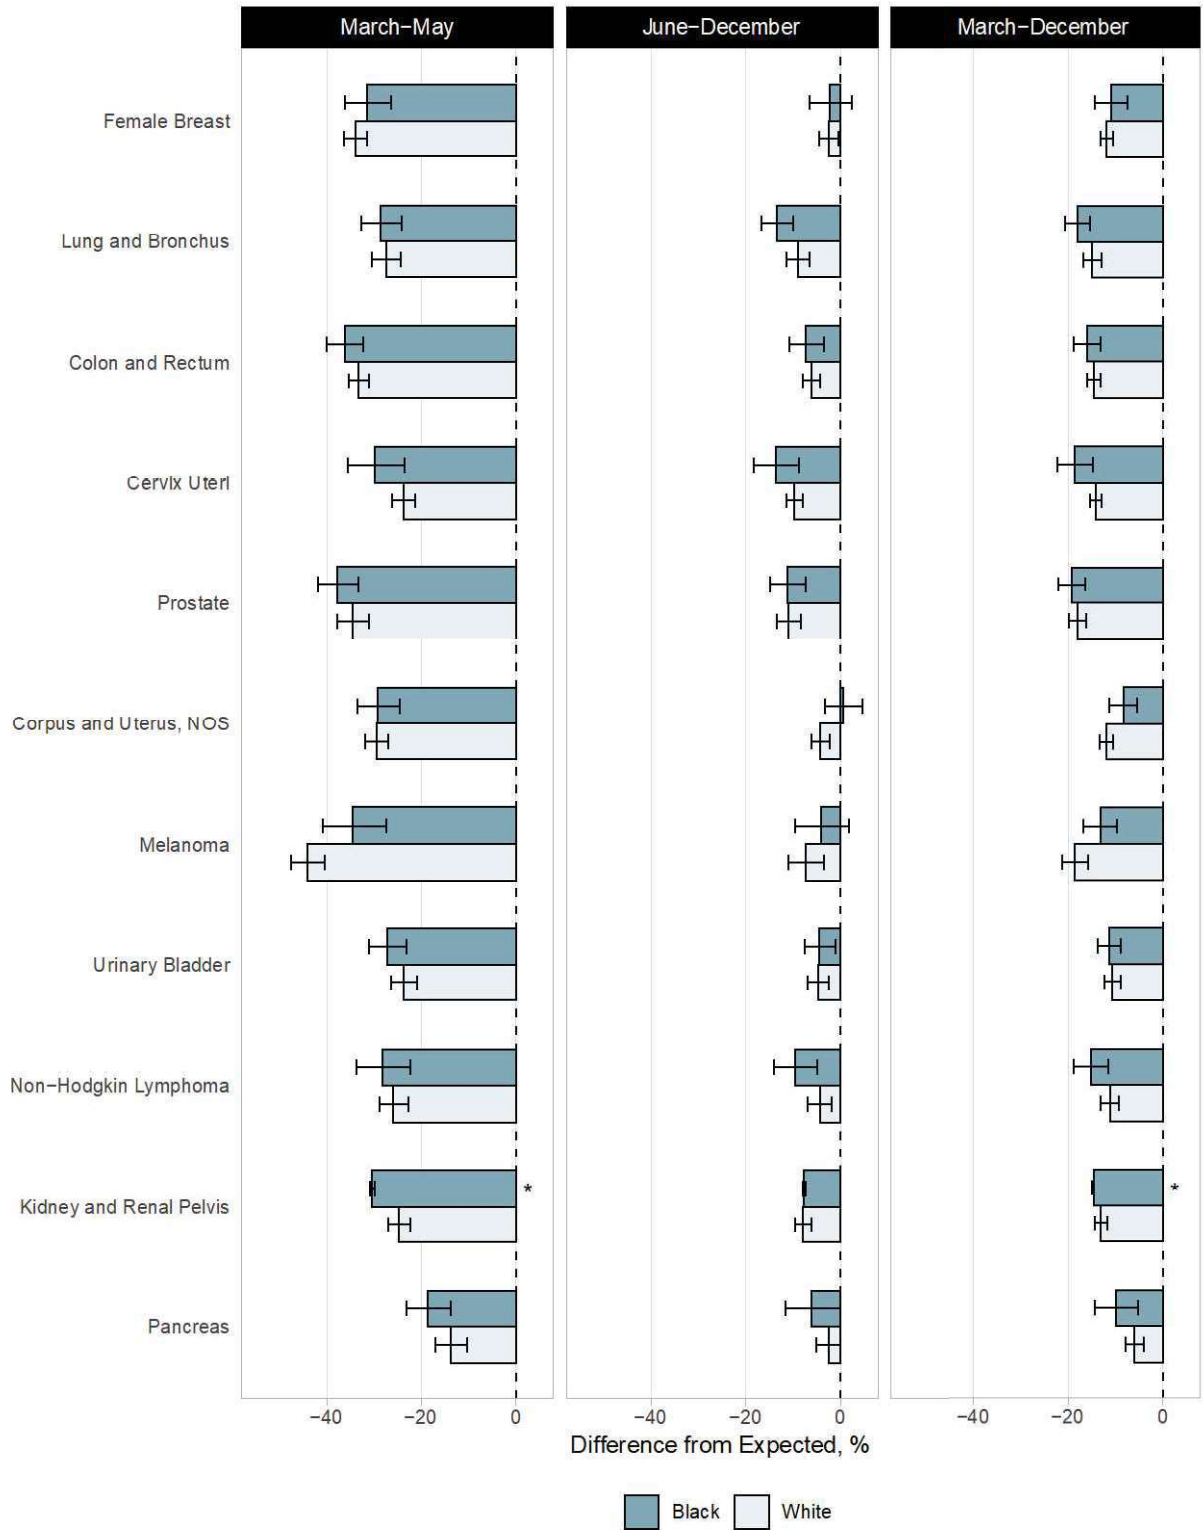

**eFigure 8. Percentage Difference in Observed from Expected Incidence Rates, by Sex, Site, and Period, March-December 2020.** Error bars indicate the 95% prediction interval (PI). (\*) indicates significantly worse disruption than comparison group based on non-overlapping 95% PIs.

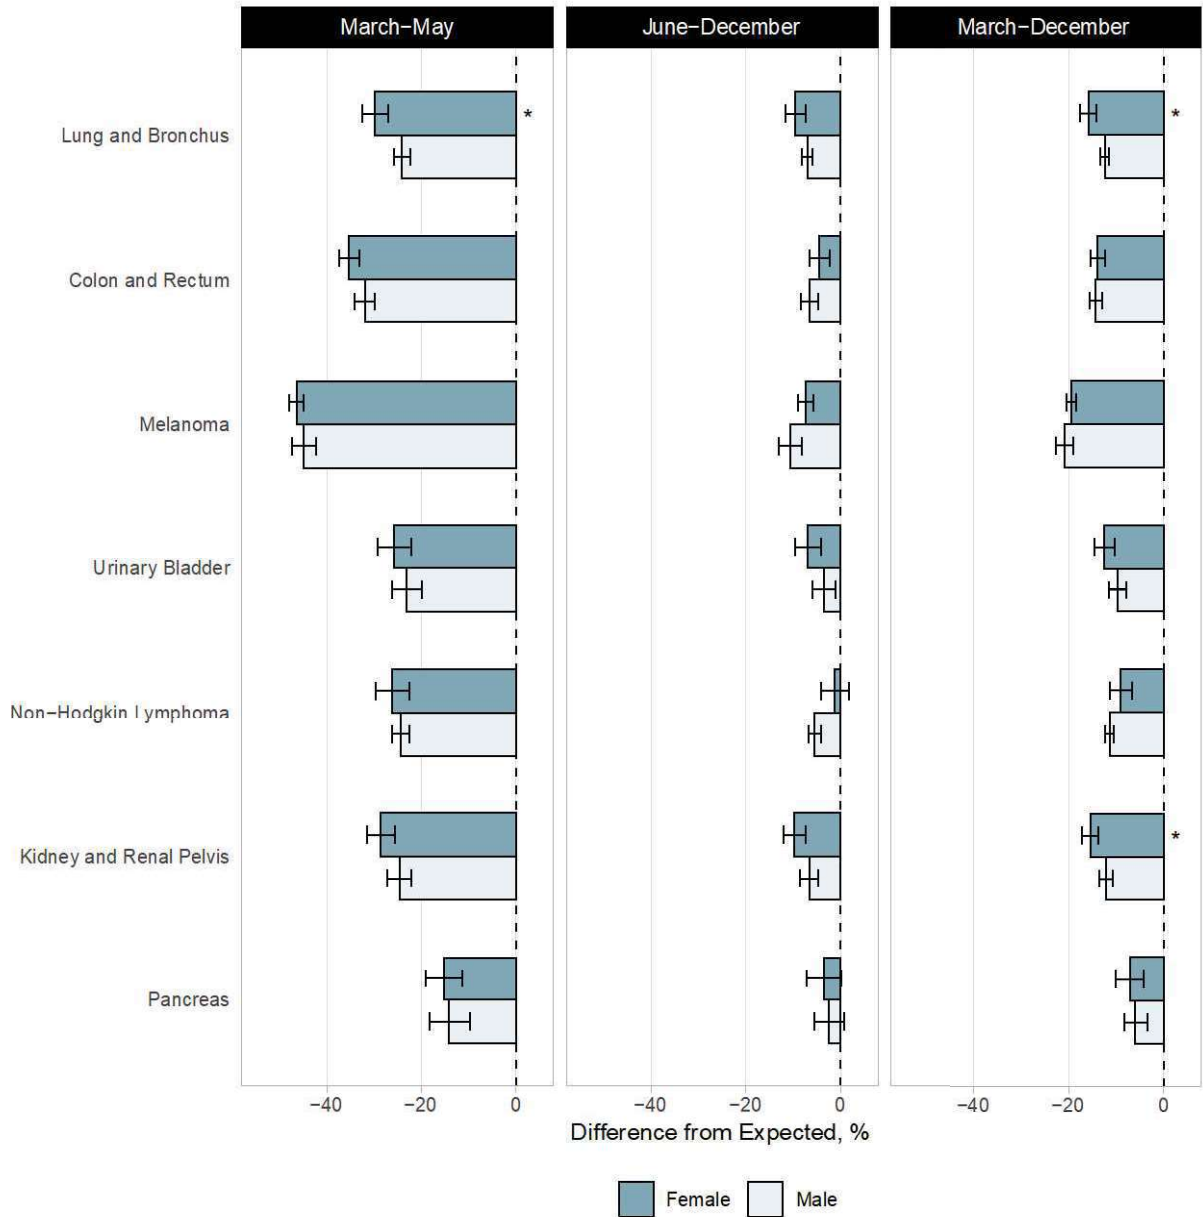

## References

1. Schaffer AL, Dobbins TA, Pearson SA. Interrupted time series analysis using autoregressive integrated moving average (ARIMA) models: a guide for evaluating large-scale health interventions. *BMC Med Res Methodol*. 2021;21(1):58. doi:10.1186/s12874-021-01235-8
2. Rob J Hyndman, George Athanasopoulos. *Forecasting: Principles and Practice*. 2nd ed. OTexts: Melbourne, Australia Accessed July 8, 2023. OTexts.com/fpp2
3. Hale T, Angrist N, Goldszmidt R, et al. A global panel database of pandemic policies (Oxford COVID-19 Government Response Tracker). *Nat Hum Behav*. 2021;5(4):529-538. doi:10.1038/s41562-021-01079-8
4. OxCGRT\_USA\_differentiated\_withnotes\_2020.csv from the Oxford Covid-19 Government Response Tracker (OxCGRT). Published online July 14, 2023.
5. National Program of Cancer Registries and Surveillance, Epidemiology, and End Results Program SEER\*Stat Database: NPCR and SEER Incidence – U.S. Cancer Statistics 2001–2020 Public Use Research Database, 2022 submission (2001–2020), United States Department of Health and Human Services, Centers for Disease Control and Prevention and National Cancer Institute. Released June 2023. [www.cdc.gov/cancer/uscs/public-use](http://www.cdc.gov/cancer/uscs/public-use)
