# Supplementary material for: Undiagnosed Cancer Cases in the US During the First 10 Months of the COVID-19 Pandemic
Source: PubMed Central journal article supplement (PMC10884945; doi:10.1001/jamaoncol.2023.6969), 2024-02-22
Supplement: jamaoncol-e236969-s002.pdf [file jamaoncol-e236969-s002.pdf]

## Data Sharing Statement

Burus. Undiagnosed Cancer Cases in the US During the First 10 Months of the COVID-19 Pandemic. *JAMA Oncol.* Published February 22, 2024. doi:10.1001/jamaoncol.2023.6969

### Data

**Data available:** No

### Additional Information

**Explanation for why data not available:** The data used for this study is from the U.S. Cancer Statistics (USCS) Public Use Database. Investigators can access this data through a data use agreement with USCS.
